# Supplementary material for: Small-molecule induction of phospho-eIF4E sumoylation and degradation via targeting its phosphorylated serine 209 residue
Source: PubMed Central journal article supplement (PMC4558139; doi:10.18632/oncotarget.3615), 2015-04-10
Supplement: oncotarget-06-15111-s001.pdf [file oncotarget-06-15111-s001.pdf]

## SUPPLEMENTARY FIGURES AND TABLE

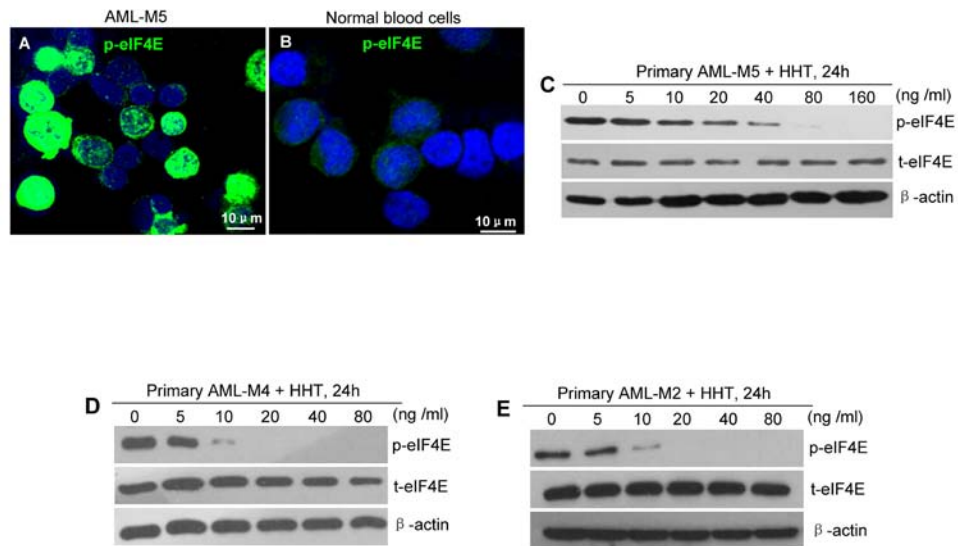

**Supplementary Figure S1: p-eIF4E is highly expressed in primary leukemia cells of AML patients and reduced by HHT.** (A–B) Images of immunofluorescence staining of p-eIF4E from primary AML-M5 cells **A**, and normal blood cells **B**. Green: p-eIF4E. Blue: cell nucleus visualized by DAPI. (C–E) HHT selectively reduced p-eIF4E in a dose-dependent manner but did not affect t-eIF4E of AML primary leukemia cells. Primary leukemia cells were treated with HHT at indicated concentrations for 24 h and then collected for analyses of p-eIF4E and t-eIF4E.  $\beta$ -actin was used as loading control.

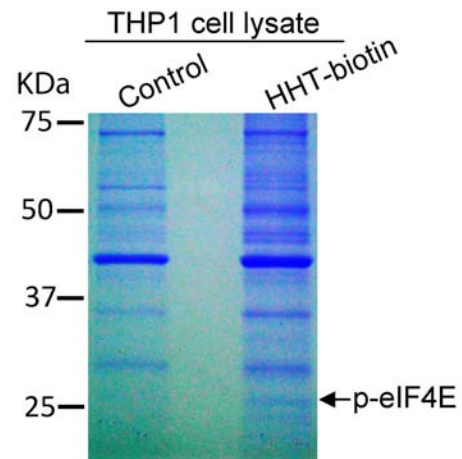

**Supplementary Figure S2: Identification of p-eIF4E protein that interacts with HHT.** Cell lysates from THP1 cells were incubated with HHT-biotin or biotin followed by co-precipitated with streptavidin agarose resin. Co-precipitated complexes were separated by SDS-polyacrylamine gel electrophoresis (SDS-PAGE) and coomassie brilliant blue staining. The identification of eIF4E was achieved by mass spectroscopic analysis.

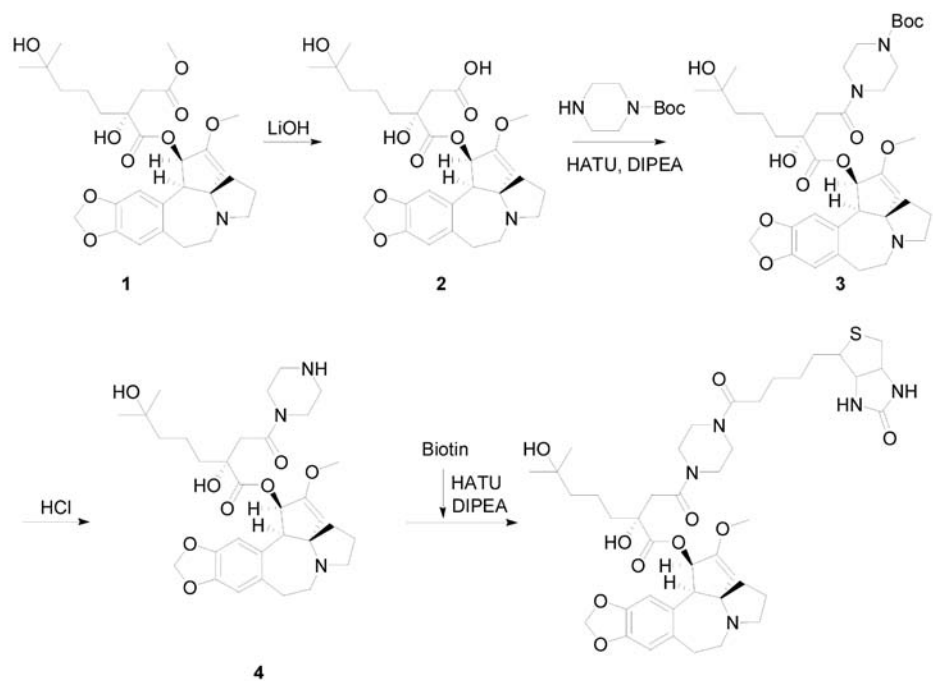

Supplementary Figure S3: The structure of HHT-biotin and its preparation procedure.

Supplementary Table S1. Bioactivities of HHT and its analogs

| Entry                                                                                              | Structure                                                                           | IC50 (ng/ml)  |                     |
|----------------------------------------------------------------------------------------------------|-------------------------------------------------------------------------------------|---------------|---------------------|
|                                                                                                    |                                                                                     | p-eIF4E level | THP-1 proliferation |
| HHT<br>C <sub>29</sub> H <sub>39</sub> NO <sub>9</sub><br>MW:545.62                                | 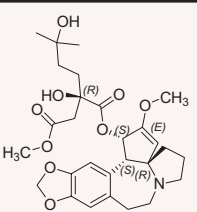   | 64.54         | 9.72                |
| HT<br>C <sub>28</sub> H <sub>37</sub> NO <sub>9</sub><br>MW:545.62                                 |    | 113.36        | 24.06               |
| H0722<br>C <sub>39</sub> H <sub>45</sub> N <sub>3</sub> O <sub>11</sub> S <sub>2</sub><br>MW:795.9 |   | 306.55        | 460.8               |
| H021<br>C <sub>33</sub> H <sub>46</sub> N <sub>2</sub> O <sub>9</sub><br>MW:614.7                  |  | 1280.93       | 7466.74             |
| H0732<br>C <sub>43</sub> H <sub>47</sub> NO <sub>11</sub><br>MW:753.8                              |  | 804.72        | 3284.59             |
| H025<br>C <sub>33</sub> H <sub>46</sub> N <sub>2</sub> O <sub>9</sub><br>MW:614.7                  |  | 676.43        | 5434.63             |
